# Supplementary material
Source: ML conference proceedings conference paper supplement (https://proceedings.neurips.cc/paper_files/paper/2019/hash/43207fd5e34f87c48d584fc5c11befb8-Abstract.html)
Supplement: Supplementary file [file 43207fd5e34f87c48d584fc5c11befb8-Supplemental.zip]

## 7 Appendix

### 7.1 Stick-Breaking: Beta to Dirichlet

In this section, we prove theorem 1. Prior to executing the **while** loop, algorithm 1 samples  $v_{o_1} \sim \text{Beta}(\alpha_{o_1}, \sum_{j=2}^K \alpha_{o_j})$  and assigns  $x_{o_1} \leftarrow v_{o_1}$ . Therefore,  $x_{o_1}$  has density

$$p(x_{o_1}) = \frac{\Gamma(\sum_{j=1}^K \alpha_{o_j})}{\Gamma(\alpha_{o_1})\Gamma(\sum_{j=2}^K \alpha_{o_j})} x_{o_1}^{\alpha_{o_1}-1} (1-x_{o_1})^{(\sum_{j=2}^K \alpha_{o_j})-1}. \quad (10)$$

In the case  $K = 2$ , algorithm 1 does not execute the **while** loop and concludes after assigning  $x_{o_2} \leftarrow 1 - x_{o_1}$ . From one perspective, algorithm 1 returns a 2-dimensional variable whose density is fully determined by the first dimension (the only degree of freedom for the 1-simplex). In the  $K = 2$  case, this univariate density is the only utilized base distribution, the  $\text{Beta}(x; \alpha_{o_1}, \alpha_{o_2})$ . However, if one wants to incorporate  $x_{o_2}$  into this density, one can substitute  $x_{o_2}$  for  $1 - x_{o_1}$  as follows:

$$p(x_{o_1}, x_{o_2}) = \frac{\Gamma(\alpha_{o_1} + \alpha_{o_2})}{\Gamma(\alpha_{o_1})\Gamma(\alpha_{o_2})} x_{o_1}^{\alpha_{o_1}-1} x_{o_2}^{\alpha_{o_2}-1} = \text{Dirichlet}(x; \alpha).$$

Thus, we have proved correctness of algorithm 1 for  $K = 2$ . For  $K > 2$ , algorithm 1 will execute the **while** loop. Therefore, we will use induction to prove loop correctness. At the  $i^{\text{th}}$  iteration of the loop, algorithm 1 samples  $v_{o_i} \sim \text{Beta}(\alpha_{o_i}, \sum_{j=i+1}^K \alpha_{o_j})$  and assigns  $x_{o_i} \leftarrow v_{o_i} (1 - \sum_{j=1}^{i-1} x_{o_j})$ . Using eq. (2) as the inverse to our change-of-variables transformation, we can claim, at the  $i^{\text{th}}$  iteration of the loop, that  $p(x_{o_i} | x_{o_1}, \dots, x_{o_{i-1}})$

$$\begin{aligned} &= \text{Beta}\left(x_{o_i} \left(1 - \sum_{j=1}^{i-1} x_{o_j}\right)^{-1}; \alpha_{o_i}, \sum_{j=i+1}^K \alpha_{o_j}\right) \left(1 - \sum_{j=1}^{i-1} x_{o_j}\right)^{-1} \\ &= \frac{\Gamma(\sum_{j=i}^K \alpha_{o_j})}{\Gamma(\alpha_{o_i})\Gamma(\sum_{j=i+1}^K \alpha_{o_j})} \frac{x_{o_i}^{\alpha_{o_i}-1}}{\left(1 - \sum_{j=1}^{i-1} x_{o_j}\right)^{\alpha_{o_i}}} \frac{\left(1 - \sum_{j=1}^i x_{o_j}\right)^{(\sum_{j=i+1}^K \alpha_{o_j})-1}}{\left(1 - \sum_{j=1}^{i-1} x_{o_j}\right)^{(\sum_{j=i+1}^K \alpha_{o_j})-1}} \\ &= \frac{\Gamma(\sum_{j=i}^K \alpha_{o_j})}{\Gamma(\alpha_{o_i})\Gamma(\sum_{j=i+1}^K \alpha_{o_j})} x_{o_i}^{\alpha_{o_i}-1} \left(1 - \sum_{j=1}^{i-1} x_{o_j}\right)^{1 - (\sum_{j=i}^K \alpha_{o_j})} \left(1 - \sum_{j=1}^i x_{o_j}\right)^{(\sum_{j=i+1}^K \alpha_{o_j})-1}. \end{aligned} \quad (11)$$

For  $K > 2$ , consider the base case where  $i = 2$ , corresponding to the first of  $(K - 2)$  **while** loop iterations. Leveraging eq. (11) for for this initial iteration ( $i = 2$ ), we find that  $p(x_{o_2} | x_{o_1})$

$$= \frac{\Gamma(\sum_{j=2}^K \alpha_{o_j})}{\Gamma(\alpha_{o_2})\Gamma(\sum_{j=3}^K \alpha_{o_j})} x_{o_2}^{\alpha_{o_2}-1} (1-x_{o_1})^{1 - (\sum_{j=2}^K \alpha_{o_j})} (1-x_{o_1}-x_{o_2})^{(\sum_{j=3}^K \alpha_{o_j})-1}.$$

For  $K > 2$  and the  $i = 2$  base case, multiplying this  $p(x_{o_2} | x_{o_1})$  by  $p(x_{o_1})$  (eq. (10)) to construct a joint density yields:

$$\begin{aligned} p(x_{o_1}, x_{o_2}) &= p(x_{o_1})p(x_{o_2} | x_{o_1}) \\ &= \frac{\Gamma(\sum_{j=1}^K \alpha_{o_j})}{\Gamma(\alpha_{o_1})\Gamma(\alpha_{o_2})\Gamma(\sum_{j=3}^K \alpha_{o_j})} x_{o_1}^{\alpha_{o_1}-1} x_{o_2}^{\alpha_{o_2}-1} (1-x_{o_1}-x_{o_2})^{(\sum_{j=3}^K \alpha_{o_j})-1}. \end{aligned}$$

Indeed,  $p(x_{o_1}, x_{o_2})$  can be viewed as  $\text{Dirichlet}(x_{o_1}, x_{o_2}, x_{o_3}; \alpha_{o_1}, \alpha_{o_2}, \sum_{j=3}^K \alpha_{o_j})$  after substituting  $x_{o_3}$  for  $1 - x_{o_1} - x_{o_2}$ . Recall that we already proved  $p(x_{o_1})$  is Dirichlet (eq. (10)). Consequently, the **while** loop is guaranteed to begin with a Dirichlet. Just now, we proved the joint density after the

first **while** loop iteration also is Dirichlet. Because algorithm 1 concludes **while** loop execution after  $i = K - 1$ , if we can prove for subsequent iterations (the inductive step) that the density is also a Dirichlet, then we have completed the proof via induction. Similar to the  $i = 2$  base case, one can write the joint density resulting after the  $i^{th}$  loop iteration as  $p(x_{o_1}, \dots, x_{o_i})$

$$= \frac{\Gamma\left(\sum_{j=1}^K \alpha_{o_j}\right)}{\left(\prod_{j=1}^i \Gamma(\alpha_{o_i})\right) \Gamma\left(\sum_{j=i+1}^K \alpha_{o_j}\right)} \left(\prod_{j=1}^i x_{o_i}^{\alpha_{o_i}-1}\right) \left(1 - \sum_{j=1}^i x_{o_j}\right) \left(\sum_{j=i+1}^K \alpha_{o_j}\right)^{-1}.$$

The next **while** loop iteration has conditional density  $p(x_{o_{i+1}} | x_{o_1}, \dots, x_{o_i})$ , which when multiplied by  $p(x_{o_1}, \dots, x_{o_i})$ , yields a joint density  $p(x_{o_1}, \dots, x_{o_{i+1}})$

$$= \frac{\Gamma\left(\sum_{j=1}^K \alpha_{o_j}\right)}{\left(\prod_{j=1}^{i+1} \Gamma(\alpha_{o_i})\right) \Gamma\left(\sum_{j=i+2}^K \alpha_{o_j}\right)} \left(\prod_{j=1}^{i+1} x_{o_i}^{\alpha_{o_i}-1}\right) \left(1 - \sum_{j=1}^{i+1} x_{o_j}\right) \left(\sum_{j=i+2}^K \alpha_{o_j}\right)^{-1}.$$

Substituting  $x_{o_{i+2}}$  for  $1 - \sum_{j=1}^{i+1} x_{o_j}$ , yields  $\text{Dirichlet}(x_{o_1}, \dots, x_{o_{i+2}}; \alpha_{o_1}, \dots, \alpha_{o_{i+1}}, \sum_{j=i+2}^K \alpha_{o_j})$ . Hence, we have completed a proof of theorem 1.

## 7.2 Stick-Breaking: Kumaraswamy

In this section, we derive, in the cases of the 1-simplex and the 2-simplex, the density of the random variable return by algorithm 1 when  $p_i(v; a_i, b_i) \equiv \text{Kumaraswamy}(x; \alpha_i, \sum_{j=i+1}^K \alpha_j)$ .

### 7.2.1 Stick-Breaking: Kumaraswamy to a 1-Simplex Distribution

In the case  $K = 2$ , algorithm 1 begins by sampling  $v_{o_1} \sim \text{Kumaraswamy}(\alpha_{o_1}, \alpha_{o_2})$  and assigning  $x_{o_1} \leftarrow v_{o_1}$ . Therefore,  $x_{o_1}$  has density

$$p(x_{o_1}) = \alpha_{o_1} \alpha_{o_2} x_{o_1}^{\alpha_{o_1}-1} \left(1 - x_{o_1}^{\alpha_{o_1}}\right)^{\alpha_{o_2}-1}.$$

Because  $K = 2$ , algorithm 1 does not execute the **while** loop and concludes by assigning  $x_{o_2} \leftarrow 1 - x_{o_1}$ . From one perspective, algorithm 1 returns a 2-dimensional variable whose density is fully determined by the first dimension (the only degree of freedom for the 1-simplex). In the  $K = 2$  case, this univariate density is the only utilized base distribution, the  $\text{Kumaraswamy}(x; \alpha_{o_1}, \alpha_{o_2})$ . However, if one wants to incorporate  $x_{o_2}$  into the density, one can do so by multiplying by 1 as follows:

$$\begin{aligned} p(x_{o_1}, x_{o_2}) &= p(x_{o_1}) \left(\frac{x_{o_2}}{1 - x_{o_1}}\right)^{\alpha_{o_2}-1} \\ &= \alpha_{o_1} \alpha_{o_2} x_{o_1}^{\alpha_{o_1}-1} x_{o_2}^{\alpha_{o_2}-1} \left(\frac{1 - x_{o_1}^{\alpha_{o_1}}}{1 - x_{o_1}}\right)^{\alpha_{o_2}-1}. \end{aligned}$$

As mentioned in section 2.1, the  $(1 - x^a)$  term in the Kumaraswamy distribution induces algebraic complexities that do not cancel out (in opposition to the case of the Beta distribution).

### 7.2.2 Stick-Breaking: Kumaraswamy to a 2-Simplex Distribution

In the case  $K = 3$ , algorithm 1 begins by sampling  $v_{o_1} \sim \text{Kumaraswamy}(\alpha_{o_1}, \alpha_{o_2} + \alpha_{o_3})$  and assigning  $x_{o_1} \leftarrow v_{o_1}$ . Therefore,  $x_{o_1}$  has density

$$p(x_{o_1}) = \alpha_{o_1} (\alpha_{o_2} + \alpha_{o_3}) x_{o_1}^{\alpha_{o_1}-1} \left(1 - x_{o_1}^{\alpha_{o_1}}\right)^{\alpha_{o_2} + \alpha_{o_3} - 1}.$$

Thereafter, algorithm 1 enters the **while** loop at  $i = 2$  and samples  $v_{o_2} \sim \text{Kumaraswamy}(\alpha_{o_2}, \alpha_{o_3})$  and assigns  $x_{o_2} \leftarrow v_{o_2}(1 - x_{o_1})$ . Using eq. (2) as the inverse to our change-of-variables transforma-

tion, we can claim

$$\begin{aligned}
p(x_{o_2}|x_{o_1}) &= \text{Kumaraswamy} \left( \frac{x_{o_2}}{1-x_{o_1}}; \alpha_{o_2}, \alpha_{o_3} \right) (1-x_{o_1})^{-1} \\
&= \alpha_{o_2} \alpha_{o_3} \left( \frac{x_{o_2}}{1-x_{o_1}} \right)^{\alpha_{o_2}-1} \left( 1 - \left( \frac{x_{o_2}}{1-x_{o_1}} \right)^{\alpha_{o_2}} \right)^{\alpha_{o_3}-1} (1-x_{o_1})^{-1} \\
&= \alpha_{o_2} \alpha_{o_3} x_{o_2}^{\alpha_{o_2}-1} (1-x_{o_1})^{-\alpha_{o_2}} \left( 1 - \left( \frac{x_{o_2}}{1-x_{o_1}} \right)^{\alpha_{o_2}} \right)^{\alpha_{o_3}-1}.
\end{aligned}$$

With  $K = 3$ , the **while** loop only performs a single iteration. With all iterations complete, we can construct the joint distribution as follows:

$$\begin{aligned}
p(x_{o_1}, x_{o_2}) &= p(x_{o_1}) p(x_{o_2}|x_{o_1}) \\
&= \left[ \prod_{i=1}^3 \alpha_{o_i} \right] (\alpha_{o_2} + \alpha_{o_3}) \left[ \prod_{i=1}^2 x_{o_i}^{\alpha_{o_i}-1} \right] \frac{(1-x_{o_1})^{-\alpha_{o_2}} \left( 1 - x_{o_1}^{\alpha_{o_1}} \right)^{\alpha_{o_2}+\alpha_{o_3}-1}}{\left( 1 - \left( \frac{x_{o_2}}{1-x_{o_1}} \right)^{\alpha_{o_2}} \right)^{\alpha_{o_3}}}.
\end{aligned}$$

Unfortunately, this joint density does not admit an easy substitution for algorithm 1's final step of assigning  $x_{o_3} \leftarrow 1 - x_{o_1} - x_{o_2}$ . We therefore leave  $p(x_{o_1}, x_{o_2}, x_{o_3})$  as a function of just  $x_{o_1}$  and  $x_{o_2}$  and in the form of  $p(x_{o_1}, x_{o_2})$ , which is consistent with the fact that  $x_{o_3}$  is deterministic given  $x_{o_1}$  and  $x_{o_2}$ . In other words,  $x_{o_1}$  and  $x_{o_2}$  are the 2 degrees of freedom for the 2-simplex.

### 7.3 Model Derivation

In this section, we derive the evidence lower bound (ELBO) for the generative process outlined in the beginning of section 4 and the corresponding mean-field posterior approximation  $q(\pi, z) = q(\pi)q(z)$ . In the case of observable  $y$ , we find that

$$\begin{aligned}
\ln p(x, y) &= \ln p(x|y, z) + \ln p(y|\pi) + \ln p(\pi) + \ln p(z) - \ln p(\pi, z|x, y) \\
&= \ln p(x|y, z) + \ln p(y|\pi) - \ln \frac{q(\pi)}{p(\pi)} - \ln \frac{q(z)}{p(z)} + \ln \frac{q(\pi, z)}{p(\pi, z|x, y)} \\
&= \mathbb{E}_{q(\pi, z)} [\ln p(x|f_\theta(y, z)) + \ln \pi_y] - D_{KL}(q(\pi) || p(\pi)) \\
&\quad - D_{KL}(q(z) || p(z)) + D_{KL}(q(\pi, z) || p(\pi, z|x, y)) \\
&\geq \mathbb{E}_{q(\pi, z)} [\ln p(x|f_\theta(y, z)) + \ln \pi_y] - D_{KL}(q(\pi) || p(\pi)) - D_{KL}(q(z) || p(z)) \\
&\equiv \mathcal{L}_l(x, y, \phi, \theta).
\end{aligned}$$

In the case that  $y$  is latent, we can derive an alternative ELBO with the same mean-field posterior approximation as above:

$$\begin{aligned}
\ln p(x) &= \ln p(x|\pi, z) + \ln p(\pi) + \ln p(z) - \ln p(\pi, z|x) \\
&= \ln p(x|\pi, z) - \ln \frac{q(\pi)}{p(\pi)} - \ln \frac{q(z)}{p(z)} + \ln \frac{q(\pi, z)}{p(\pi, z|x)} \\
&= \mathbb{E}_{q(\pi, z)} [\ln p(x|\pi, z)] - D_{KL}(q(\pi) \parallel p(\pi)) \\
&\quad - D_{KL}(q(z) \parallel p(z)) + D_{KL}(q(\pi, z) \parallel p(\pi, z|x)) \\
&\geq \mathbb{E}_{q(\pi, z)} [\ln p(x|\pi, z)] - D_{KL}(q(\pi) \parallel p(\pi)) - D_{KL}(q(z) \parallel p(z)) \\
&= \mathbb{E}_{q(\pi, z)} \left[ \ln \sum_y p(x, y|\pi, z) \right] - D_{KL}(q(\pi) \parallel p(\pi)) - D_{KL}(q(z) \parallel p(z)) \\
&= \mathbb{E}_{q(\pi, z)} \left[ \ln \sum_y p(x|y, z) p(y|\pi) \right] - D_{KL}(q(\pi) \parallel p(\pi)) - D_{KL}(q(z) \parallel p(z)) \\
&= \mathbb{E}_{q(\pi, z)} \left[ \ln \sum_y p(x|f_\theta(y, z)) \pi_y \right] - D_{KL}(q(\pi) \parallel p(\pi)) - D_{KL}(q(z) \parallel p(z)) \\
&\equiv \mathcal{L}_u(x, \phi, \theta).
\end{aligned}$$

#### 7.4 Kumaraswamy-Beta KL-Divergence

For convenience, we reproduce (from [20]) the KL-Divergence between the Kumaraswamy and Beta distributions. In particular,  $D_{KL}(\text{Kumaraswamy}(a, b) \parallel \text{Beta}(\alpha, \beta)) =$

$$\frac{a - \alpha}{a} \left( -\gamma - \Psi(b) - \frac{1}{b} \right) + \log(ab) + \log B(\alpha, \beta) - \frac{b-1}{b} + (\beta-1)b \sum_{m=1}^{\infty} \frac{1}{m+ab} B\left(\frac{m}{a}, b\right)$$

where  $\gamma$  is Euler's constant,  $\Psi(\cdot)$  is the Digamma function, and  $B(\cdot, \cdot)$  is the Beta function. An  $n$ 'th order Taylor approximation of the above occurs when one replaces the infinite summation with the summation over the first  $n$  terms.

#### 7.5 Network Architecture

Our experiments exclusively utilize image data. For convenience, we define  $w_x$  and  $l_x$  as the width and length of the input images. Our inference network's hidden layers are:

1. Convolution layer with a  $5 \times 5 \times (5 \cdot \text{number of data channels})$  kernel followed by an exponential linear (ELU) [3] activation and a  $3 \times 3$  max pool with a stride of 2
2. Convolution layer with a  $3 \times 3 \times (10 \cdot \text{number of data channels})$  kernel followed by an ELU activation and a  $3 \times 3$  max pool with a stride of 2
- 3-4. A fully-connected layer with 200 outputs with an ELU activation

The last hidden layer serves as input to the output layer, which produces values for  $\alpha_\phi(x)$ ,  $\mu_\phi(x)$  and  $\Sigma_\phi(x)$  with an affine operation and application of the activations described in section 4. Our generative network's hidden layers are:

- 1-2. A fully-connected layer with 200 outputs with an ELU activation
3. A fully-connected layer with ELU activations and a reshape to achieve an output of shape  $\frac{w_x}{4} \times \frac{l_x}{4} \times (10 \cdot \text{number of data channels})$ .
- 2×4. Convolution transpose layer with a  $3 \times 3 \times (5 \cdot \text{number of data channels})$  kernel followed by an ELU activation and a  $2 \times$  bi-linear up-sample—there are 2 of these layers in parallel, one each for  $\mu_\theta(y, z)$  and  $\Sigma_\theta(y, z)$ .
- 2×5. Convolution transpose layer with a  $5 \times 5 \times (\text{number of data channels})$  kernel followed by an ELU activation and a  $2 \times$  bi-linear up-sample—as before there are 2 of these layers in parallel

These parameter sizes guarantee that  $\mu_\theta(y, z)$  and  $\Sigma_\theta(y, z)$  have the same dimensions as  $x$ . Our model offers the same attractive computational complexities as the original M2 model [13].
